# Supplementary material for: Interleukin 10 inhibits pro-inflammatory cytokine responses and killing of Burkholderia pseudomallei
Source: PubMed Central journal article supplement (PMC5316963; doi:10.1038/srep42791), 2017-02-20
Supplement: srep42791-s1.pdf [file srep42791-s1.pdf]

**Interleukin 10 inhibits pro-inflammatory cytokine responses and killing of  
*Burkholderia pseudomallei***

Bianca Kessler<sup>1</sup>, Darawan Rinchai<sup>1,4</sup>, Chidchamai Kewcharoenwong<sup>1</sup>, Arnone  
Nithichanon<sup>1</sup>, Rachael Biggart<sup>2</sup>, Catherine M. Hawrylowicz<sup>3</sup>, Gregory J. Bancroft<sup>2\*</sup>,  
Ganjana Lertmemongkolchai<sup>1\*</sup>

<sup>1</sup>Centre for Research and Development of Medical Diagnostic Laboratories, Faculty of  
Associated Medical Sciences, Khon Kaen University, Khon Kaen, Thailand.

<sup>2</sup>Department of Immunology and Infection, London School of Hygiene & Tropical  
Medicine, London, United Kingdom.

<sup>3</sup>Department of Asthma, Allergy and Respiratory Science, Guys Hospital, Kings College,  
London, United Kingdom.

**\*To whom correspondence should be addressed**

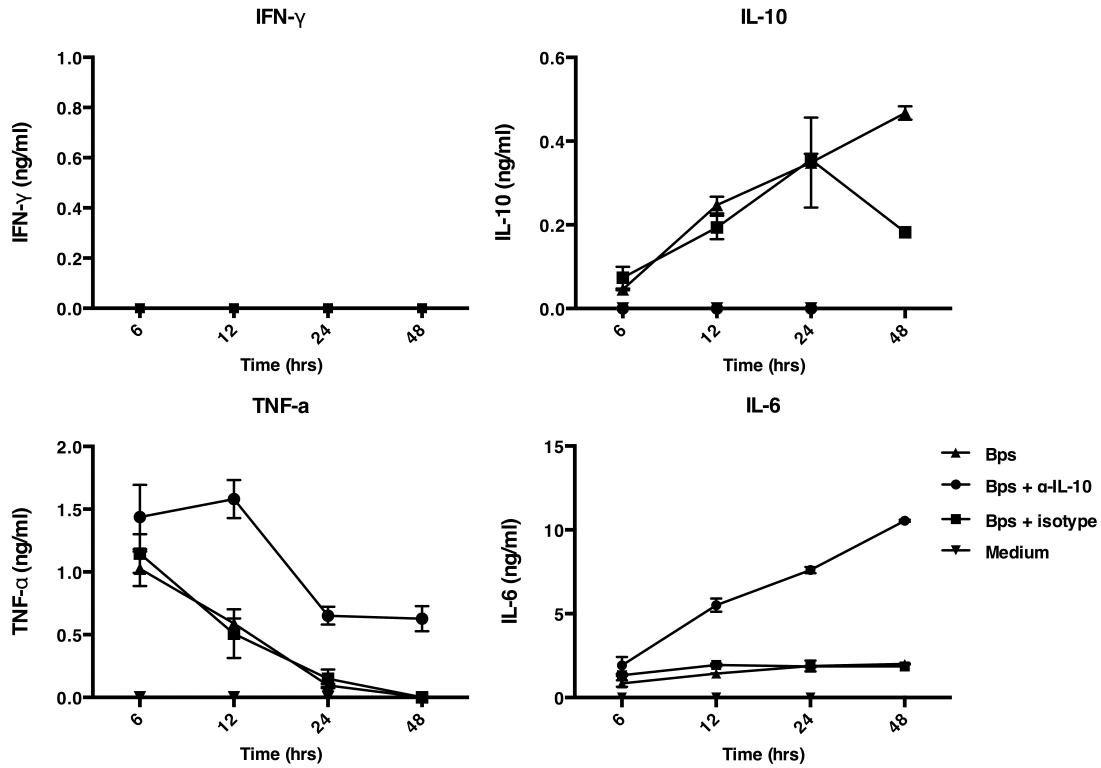

**Supplementary Figure S1: Kinetics of CD14<sup>+</sup> monocytes cytokine secretion in response to *B. pseudomallei*.** Purified CD14<sup>+</sup> monocytes were incubated with killed *B. pseudomallei* (30:1 ratio) in the presence or absence of anti-IL-10 mAb for 6, 12, 24 or 48 hours *in vitro* and culture supernatants assayed for IFN- $\gamma$ , IL-10, TNF- $\alpha$  and IL-6 by ELISA.

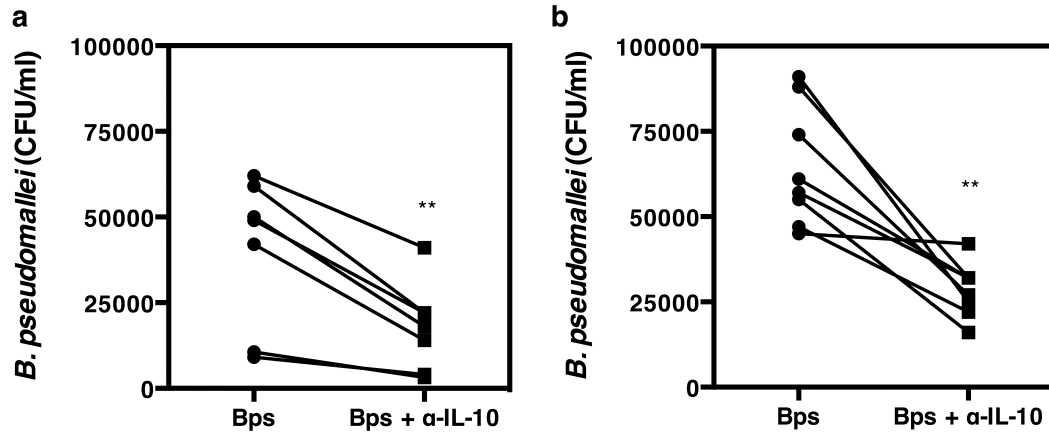

**Supplementary Figure S2: Neutralization of IL-10 increases the killing of *B.***

*pseudomallei* by CD14<sup>+</sup> monocytes. Monocytes from a healthy seropositive representative were incubated with medium, alone or live *B. pseudomallei* at an MOI of 1 in the presence or absence of 3µg/ml of anti-IL-10 mAb for 6 hours. The number of live *B. pseudomallei* was assessed by colony forming unit assay in healthy individuals (n=5) (a) and individuals with DM (n=8) (b). Statistical significance was determined using paired T test; ns, non significant, \*  $p < 0.05$ , \*\*  $p < 0.01$  and \*\*\*  $p < 0.001$ .

**Supplementary Table S1: Demographic of healthy individuals and individuals with DM whole blood**

|                                   | <b>Healthy</b> | <b>Diabetes Mellitus</b> |
|-----------------------------------|----------------|--------------------------|
| Number of subjects                | 75             | 11                       |
| Mean age (SD)                     | 47.9 (22)      | 56.5(14)                 |
| Sex (Male/Female)                 | 16/59          | 2/5                      |
| Fasting Blood glucose, mg/dL (SD) | 102 (12)       | 188 (14)                 |
| WBC (SD)                          | 6.5 (1.7)      | 7.4 (2.2)                |
| Neutrophils (SD)                  | 2.5 (2.0)      | 4.3 (2.6)                |
| Lymphocytes (SD)                  | 2.3 (0.7)      | 2.4 (0.8)                |
| Monocytes (SD)                    | 0.3 (0.1)      | 0.4 (0.2)                |
| Eosinophils (SD)                  | 0.3 (0.3)      | 0.3 (0.2)                |
| Basophils (SD)                    | 0.03 (0.02)    | 0.05 (0.02)              |

SD = standard deviation
